# Supplementary material for: Mitigating Effect of Trans-Zeatin on Cadmium Toxicity in Desmodesmus armatus
Source: MDPI journal article supplement (doi:10.3390/cells13080686), 2024-04-15
Supplement: s1 [file s1]

Supplementary Materials

# Mitigating Effect of *Trans*-Zeatin on Cadmium Toxicity in *Desmodemus armatus*

Alicja Piotrowska-Niczyporuk <sup>1</sup>, Elżbieta Bonda-Ostaszewska <sup>2</sup> and Andrzej Bajguz <sup>1,\*</sup>

<sup>1</sup> Department of Biology and Plant Ecology, Faculty of Biology, University of Białystok, Ciołkowskiego 1J, 15-245 Białystok, Poland; alicjap@uwb.edu.pl (A.P.-N.)

<sup>2</sup> Department of Evolutionary and Physiological Ecology, Faculty of Biology, University of Białystok, Ciołkowskiego 1J, 15-245 Białystok, Poland; elabonda@uwb.edu.pl (E.B.-O.)

\* Correspondence: abajguz@uwb.edu.pl; Tel.: +48-85-7388361 (A.B.)

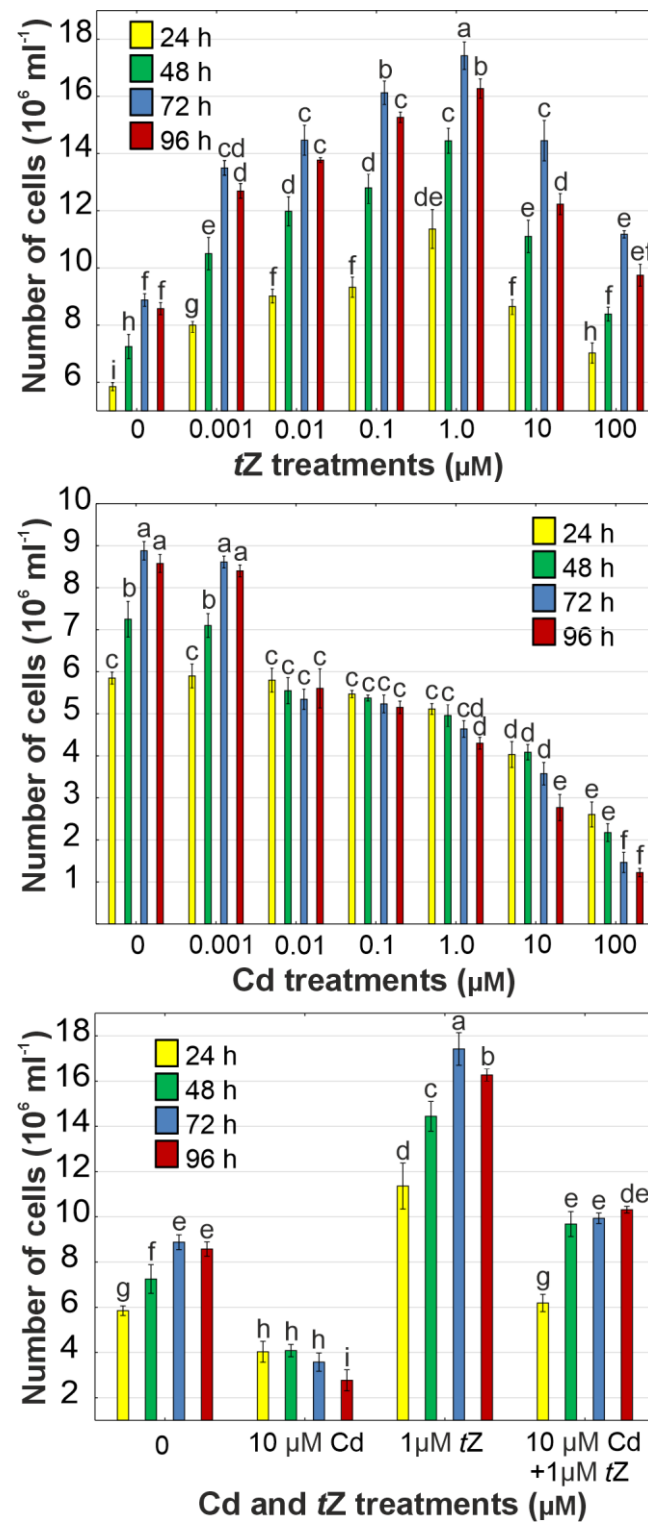

**Figure S1.** The effect of cadmium (Cd) and *trans*-zeatin (*tZ*) on the cell number in relation to control at 24, 48, 72, and 92 hours of culture. Data are the means of four independent experiments  $\pm$  SD. Treatment with at least one letter the same are not significantly different according to Tukey's Post-hoc test

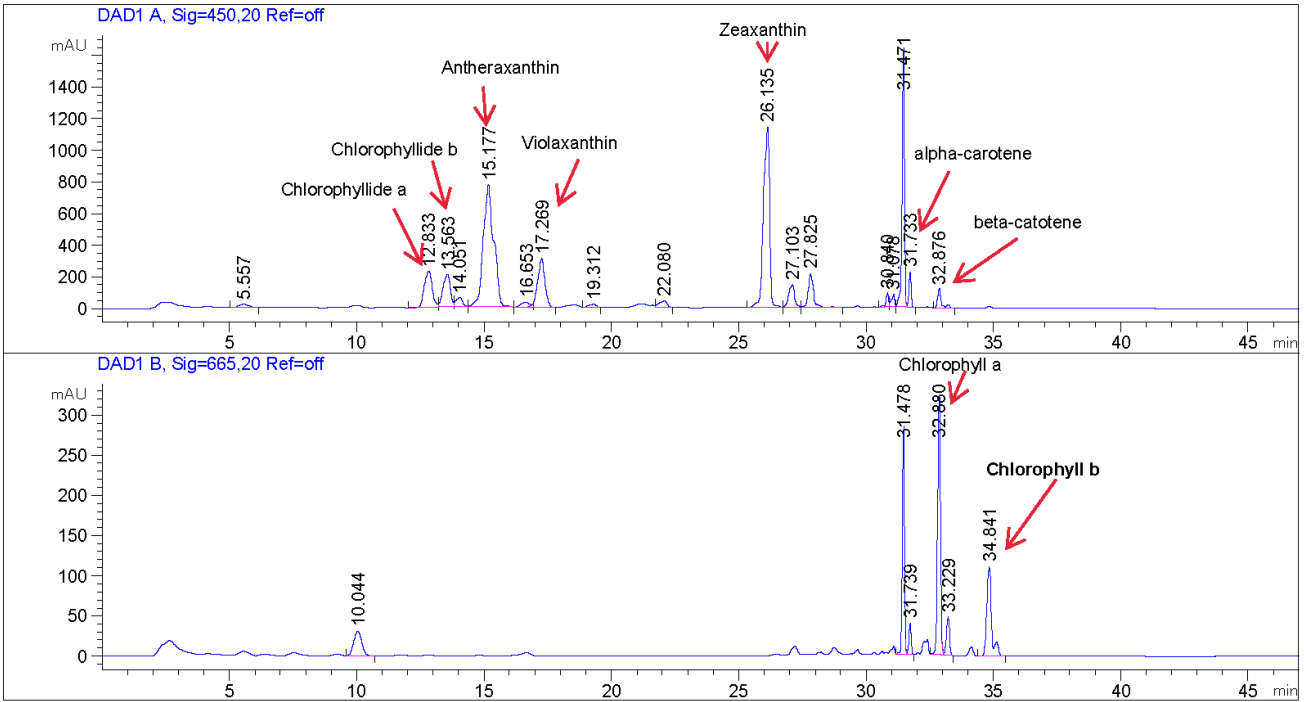

**Figure S2.** The chromatogram of photosynthetic pigments in cultures of *Desmodemus armatus* at the 72 h of cultivation

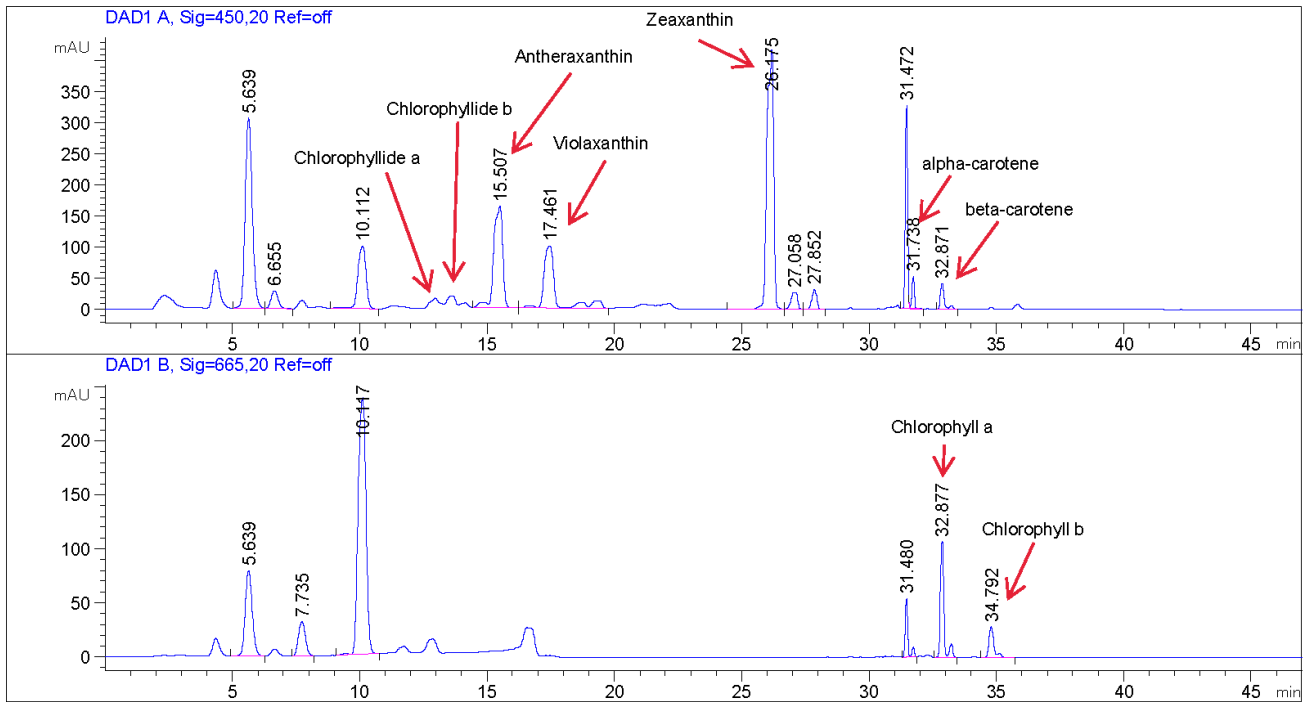

**Figure S3.** The chromatogram of photosynthetic pigments in the cultures of *Desmodemus armatus* treated with Cd at 72 h of cultivation

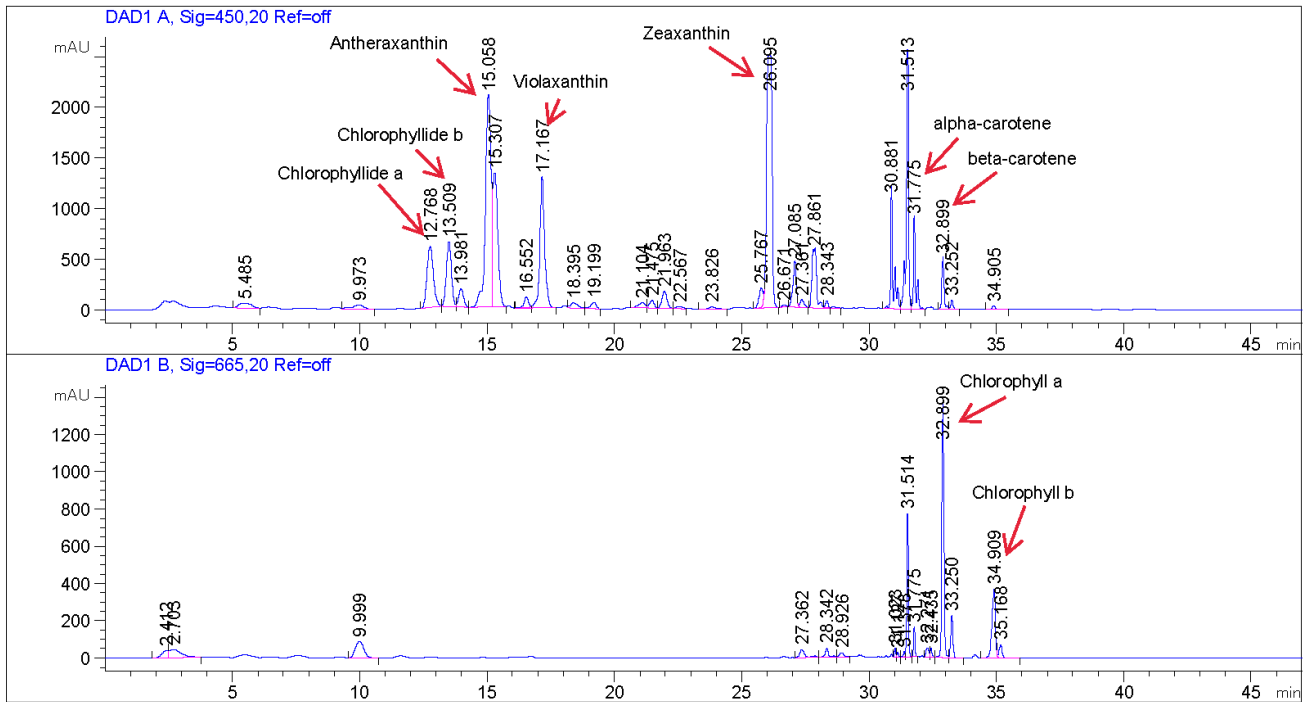

**Figure S4.** The chromatogram of photosynthetic pigments in the cultures of *Desmodemus armatus* treated with *trans*-zeatin at 72 h of cultivation

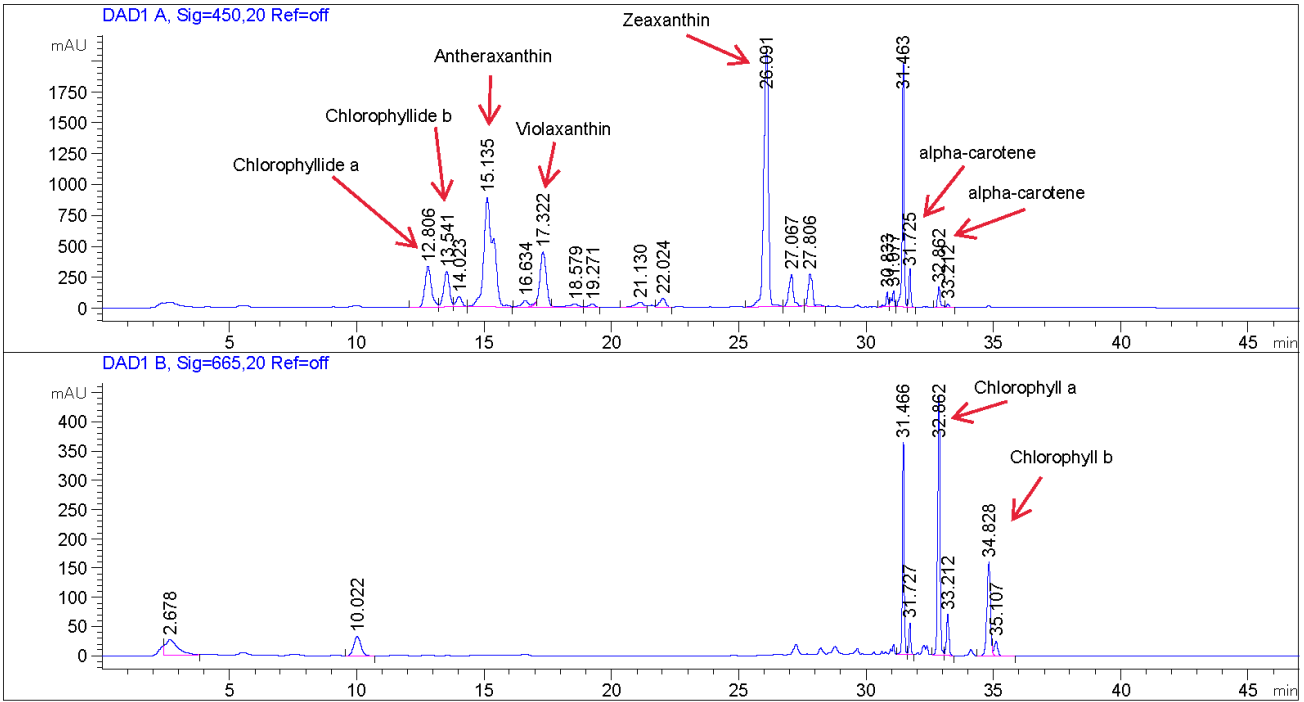

**Figure S5.** The chromatogram of photosynthetic pigments in the cultures of *Desmodemus armatus* treated with Cd and *trans*-zeatin at 72 h of cultivation

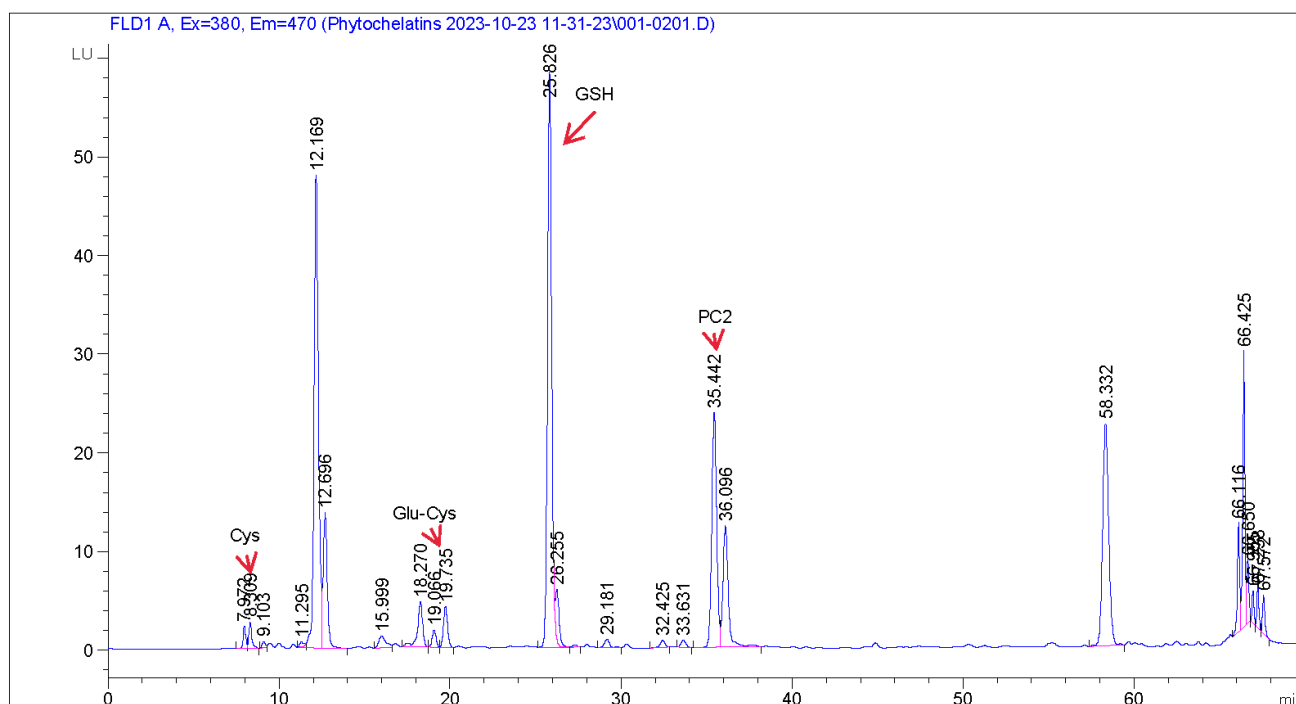

**Figure S6.** The chromatogram of phytochelatins in the cultures of *Desmodemus armatus* at 72 h of cultivation

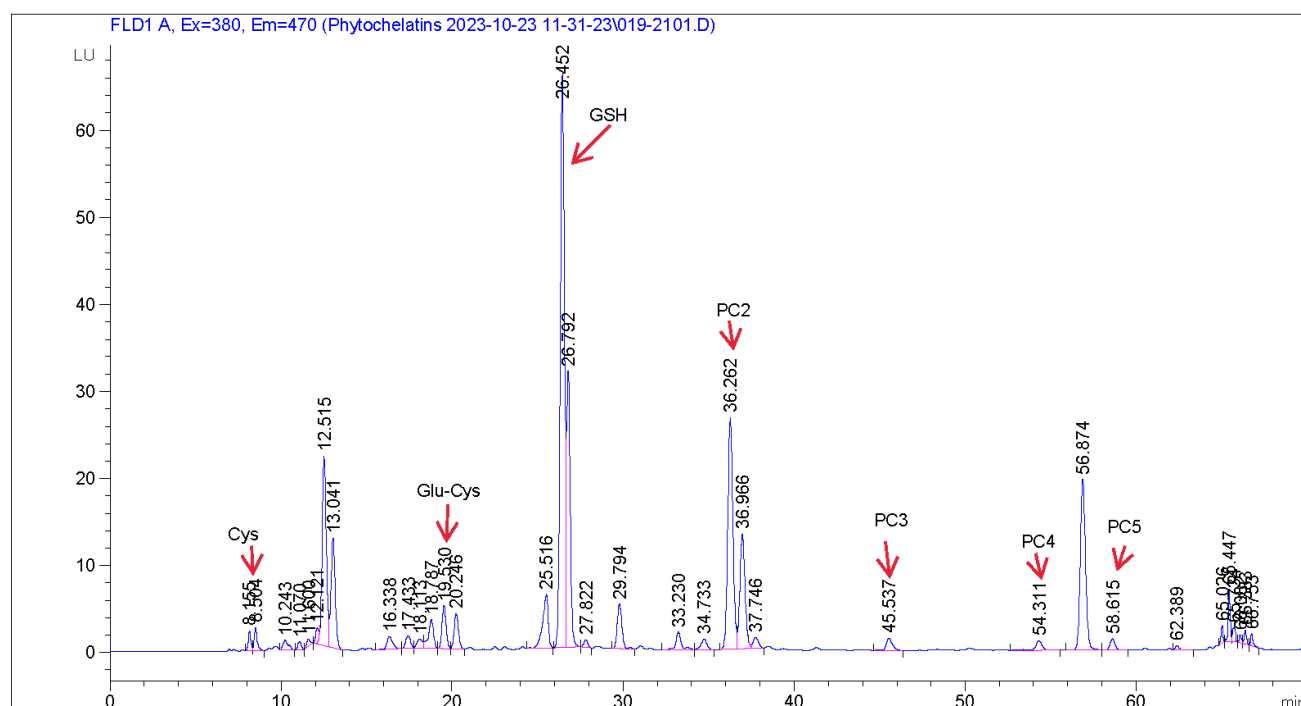

**Figure S7.** The chromatogram of phytochelatins in the cultures of *Desmodesmus armatus* treated with Cd at 72 h of cultivation



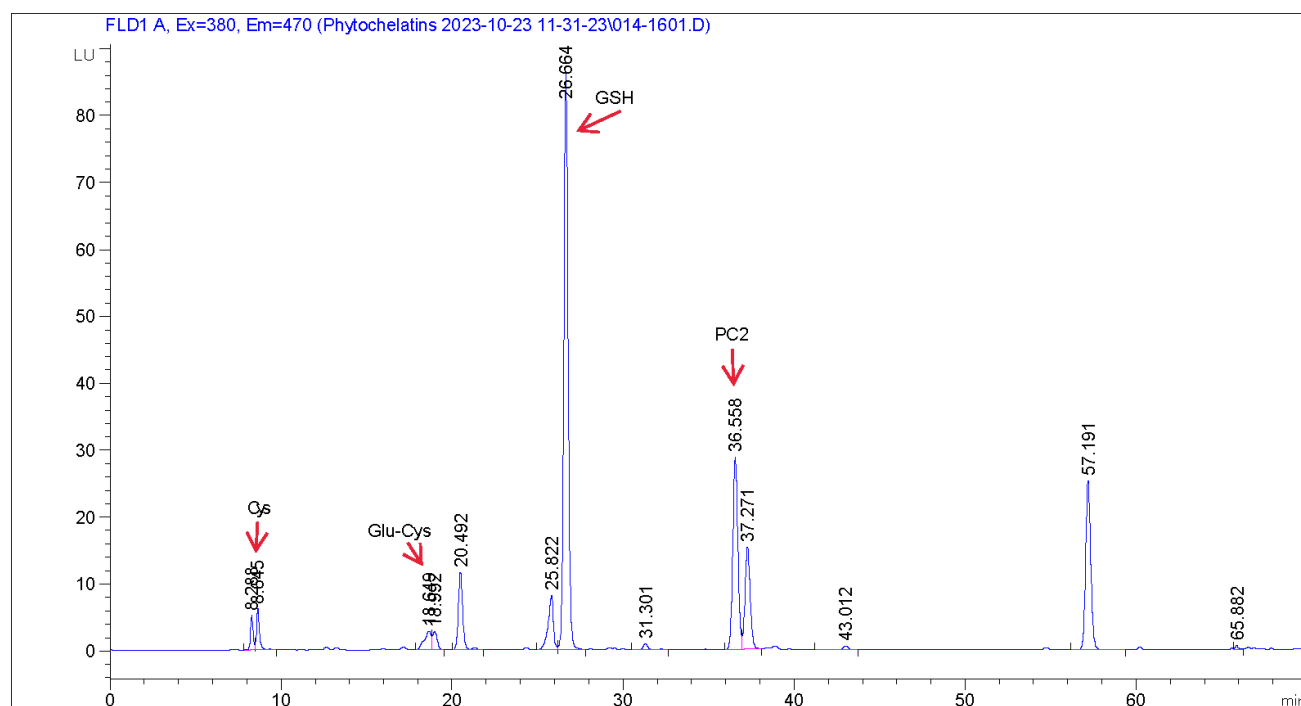

**Figure S8.** The chromatogram of phytochelatins in the cultures of *Desmodium armatus* treated with *trans*-zeatin at 72 h of cultivation

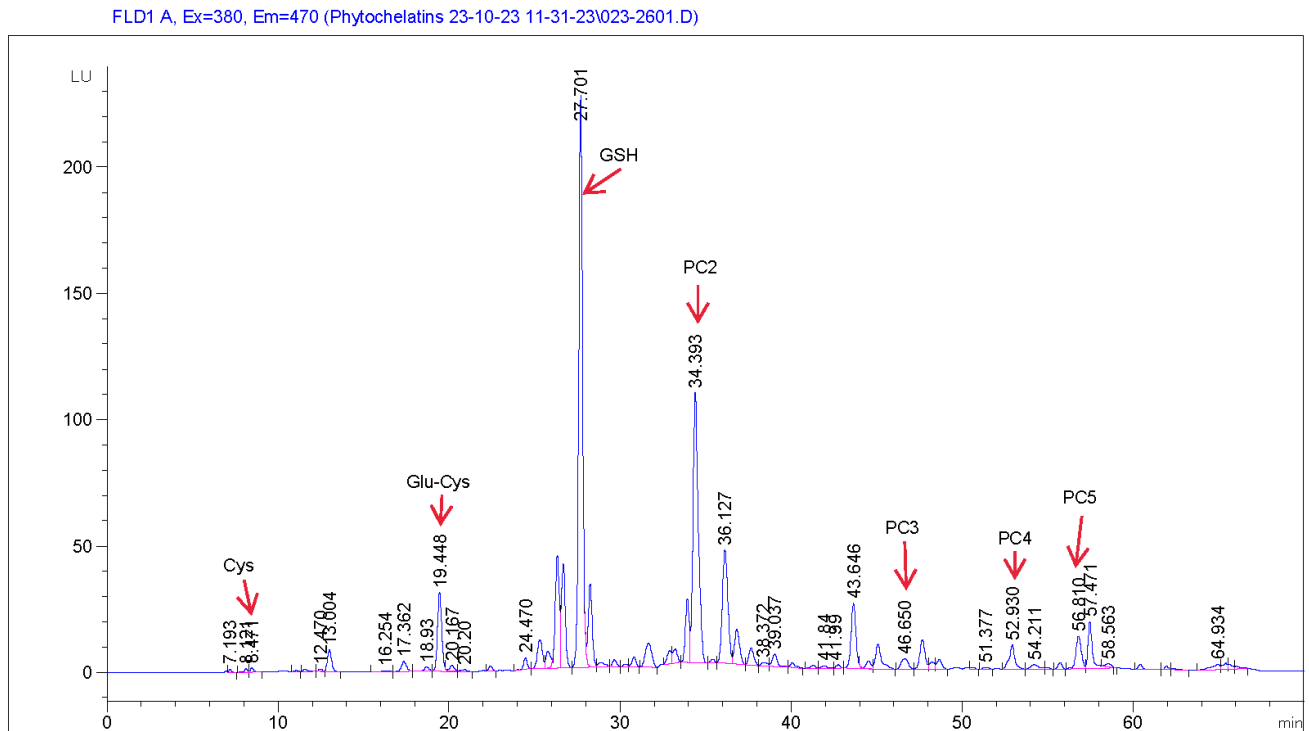

Figure S9. The chromatogram of phytochelatins in the cultures of *Desmodemus armatus* treated with Cd and trans-zeatin at 72 h of cultivation

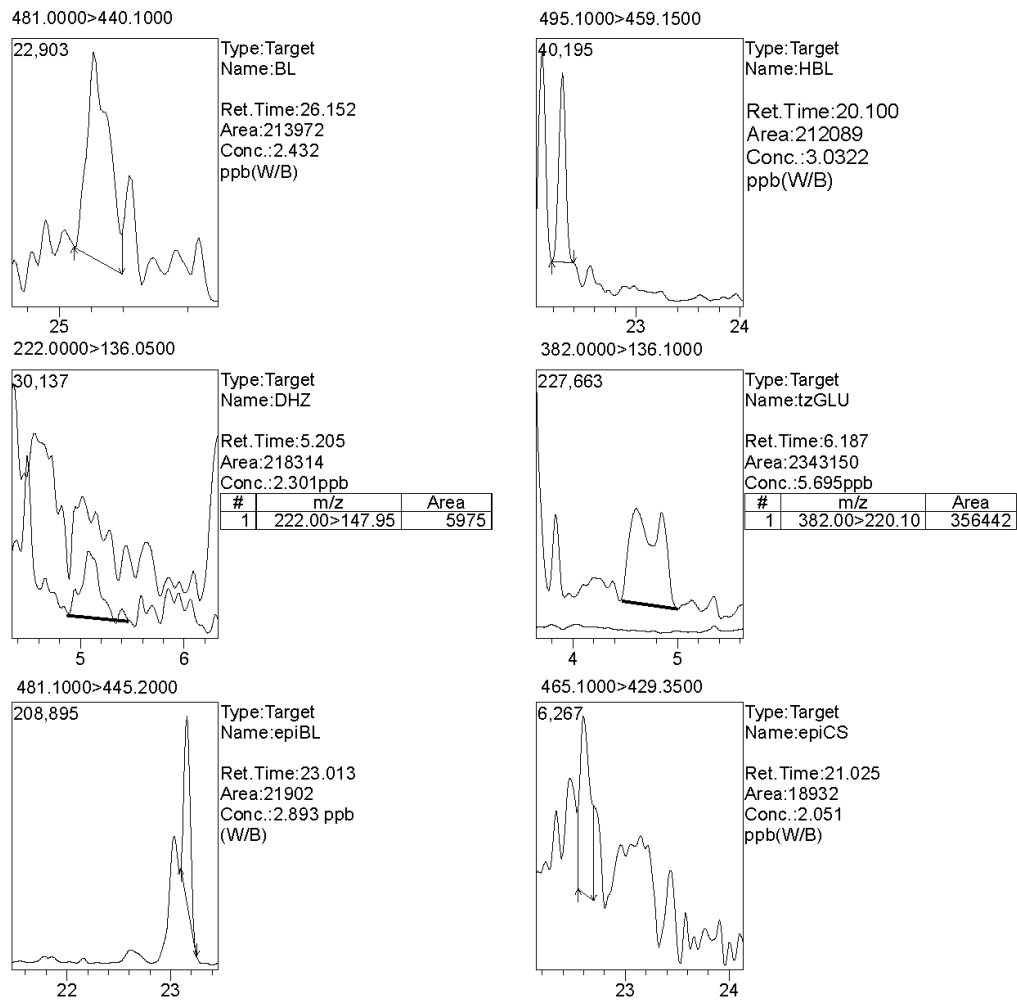

**Figure S10.** The confirmation of the presence of phytohormones in the cultures of *Desmodesmus armatus* at 72 h of cultivation

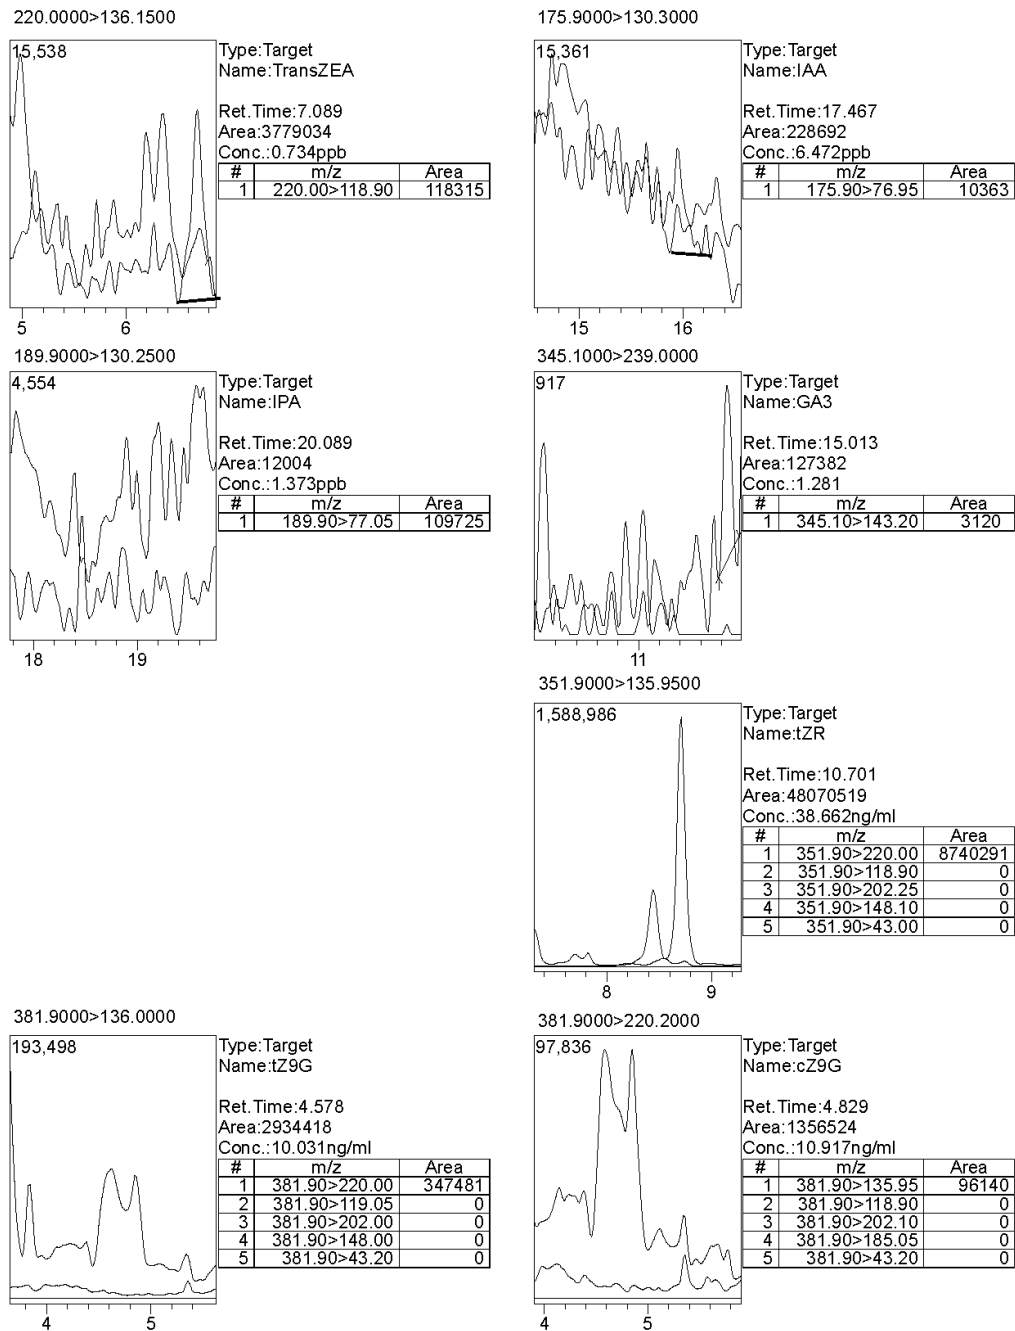

Figure S10. Continued.

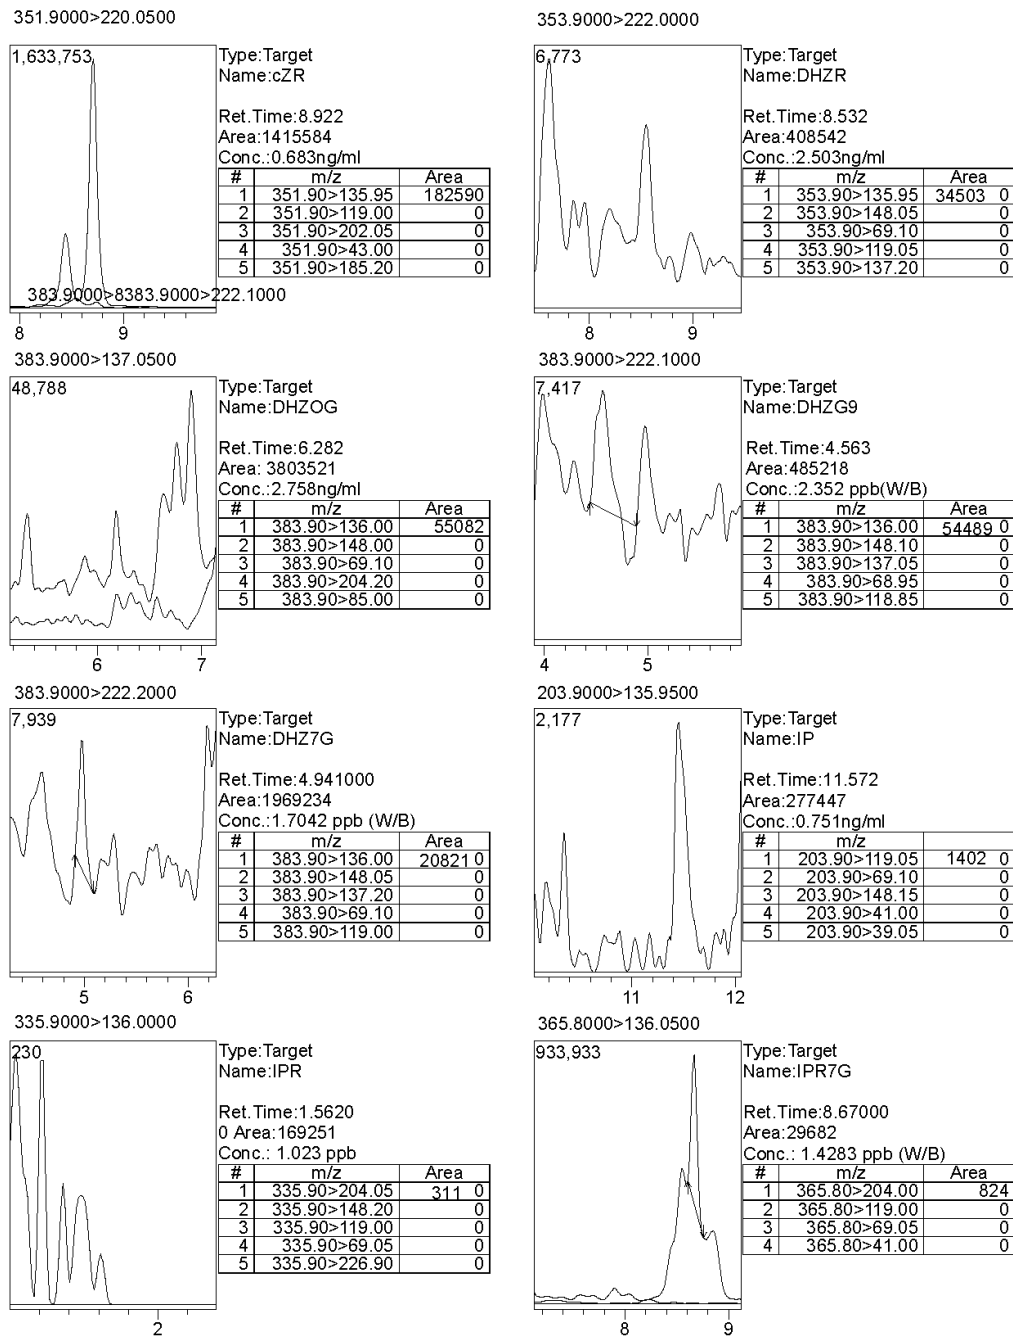

Figure S10. Continued.

203.8000&gt;186.0000

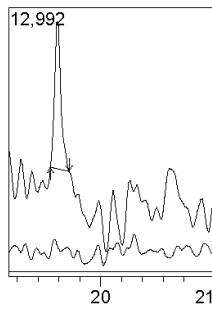Type:Target  
Name:IBA

Ret.Time:19.631

Area:23908

Conc.:1.251 ppb (W/B)

| # | m/z           | Area |
|---|---------------|------|
| 1 | 203.80>130.00 | 5103 |
| 2 | 203.80>144.10 | 0    |
| 3 | 203.80>117.00 | 0    |
| 4 | 203.80>168.00 | 0    |
| 5 | 203.80>103.05 | 0    |

467.1000&gt;431.1000

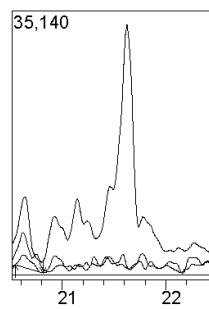Type:Target  
Name:NorBL

Ret.Time:21.361 Area:30314

Conc.:0.894 ppb (W/B)

| # | m/z           | Area |
|---|---------------|------|
| 1 | 467.10>81.20  | 2782 |
| 2 | 467.10>413.15 | 0    |
| 3 | 467.10>315.10 | 0    |
| 4 | 467.10>95.15  | 0    |
| 5 | 467.10>313.10 | 0    |

434.7000&gt;394.0500

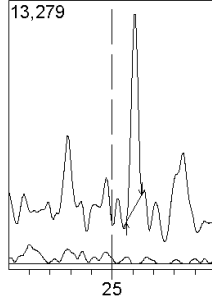Type:Target  
Name:6dTY

Ret.Time:0.000

Area:0

Conc.:N.D.(W/B)

| # | m/z           | Area |
|---|---------------|------|
| 1 | 434.70>352.75 | 0    |
| 2 | 434.70>312.25 | 0    |
| 3 | 434.70>373.00 | 0    |
| 4 | 434.70>416.50 | 0    |
| 5 | 434.70>388.90 | 0    |

432.7000&gt;365.1500

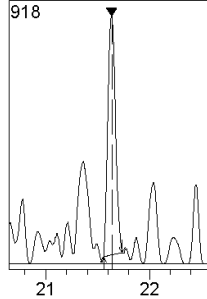Type:Target  
Name:CT

Ret.Time:21.634

Area:4233

Conc.:4.194ng/ml

| # | m/z           | Area |
|---|---------------|------|
| 1 | 432.70>391.85 | 0    |
| 2 | 432.70>351.00 | 0    |
| 3 | 432.70>368.60 | 0    |
| 4 | 432.70>415.05 | 0    |
| 5 | 432.70>309.10 | 0    |

Figure S10. Continued.

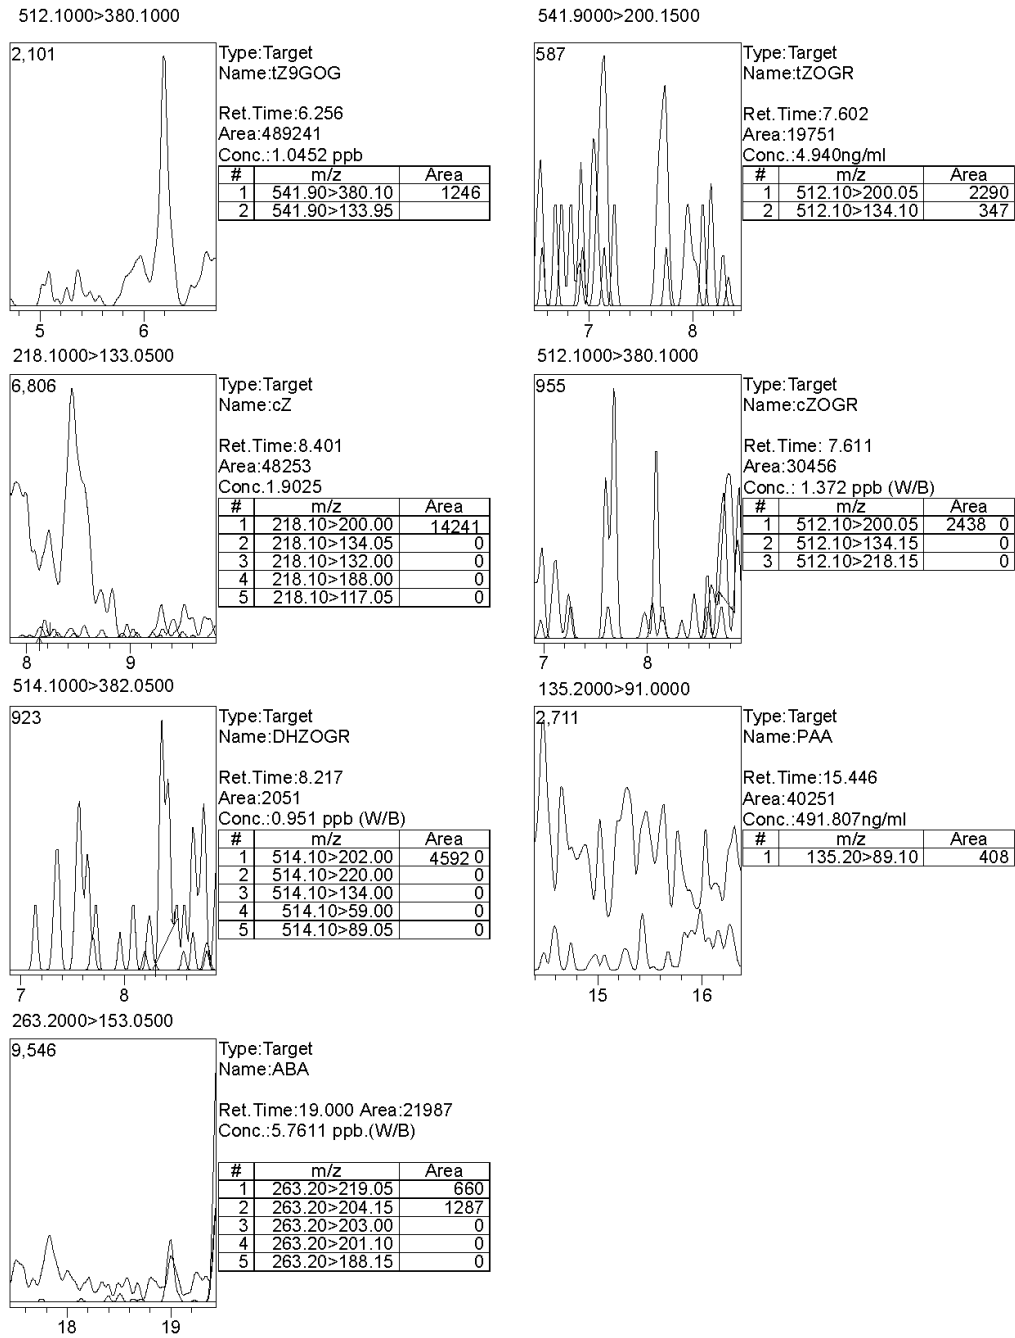

Figure S10. Continued.
